# Supplementary material
Source: publisher figshare collection journal article supplement (https://acs.figshare.com/ndownloader/files/3774619)
Supplement: Supplementary file 1 [file 3774619]

## **Supporting information**

### **Solubility and Thermodynamic Analysis of Tenoxicam in Different Pure Solvents at Different Temperatures**

Faiyaz Shakeel<sup>a,b,\*</sup>, Nazrul Haq<sup>a,b</sup>, Gamal A. Shazly<sup>b,c</sup>, Fars K. Alanazi<sup>b</sup>, Ibrahim A. Alsarra<sup>a,b</sup>

<sup>a</sup>Center of Excellence in Biotechnology Research, College of Science, King Saud University, P.O. Box 2460, Riyadh 11451, Saudi Arabia

<sup>b</sup>Kayyali Chair for Pharmaceutical Industry, Department of Pharmaceutics, College of Pharmacy, King Saud University, P.O. Box 2457, Riyadh 11451, Saudi Arabia

<sup>c</sup>Department of Industrial Pharmacy, Faculty of Pharmacy, Assiut University, Assiut, Egypt

#### **\*Corresponding Author:**

Dr. Faiyaz Shakeel

Center of Excellence in Biotechnology Research,

College of Science, King Saud University,

Riyadh, Saudi Arabia

Phone: +966-537507318

Email: [faiyazs@fastmail.fm](mailto:faiyazs@fastmail.fm)

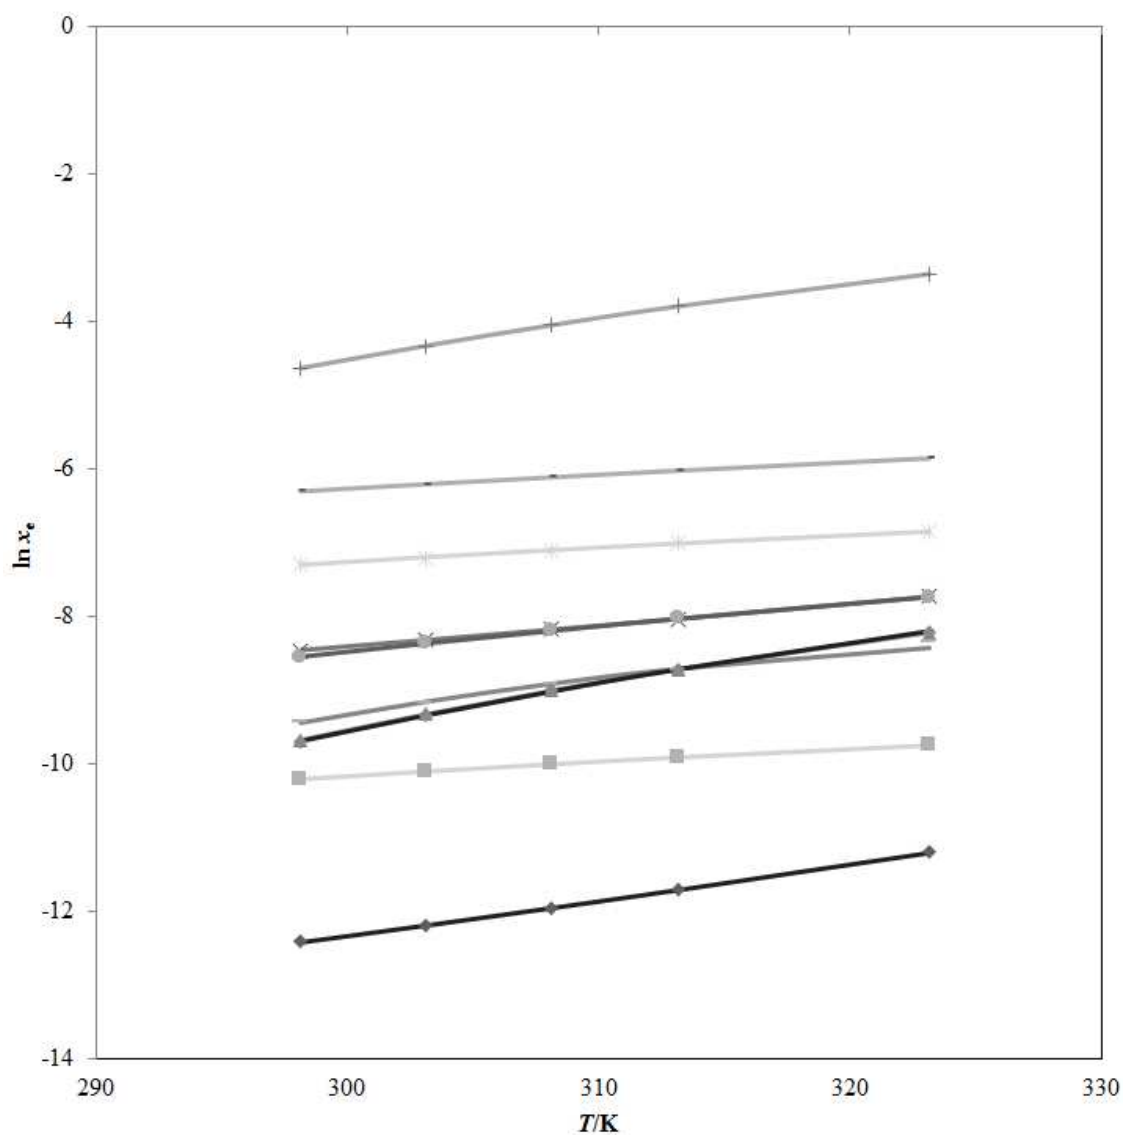

**Figure S1 Correlation of experimental solubilities of crystalline TNX with the modified Apelblat model in different pure solvents at  $T = (298.15 \text{ to } 323.15) \text{ K}$ ; ◆ water, ■ ethanol, ▲ IPA, × EG, ✱ EA, ● PG, + PEG-400, - Transcutol, — 1-butanol and ◆ 2-butanol (solid lines represent the calculated solubilities of TNX calculated by the modified Apelblat model)**

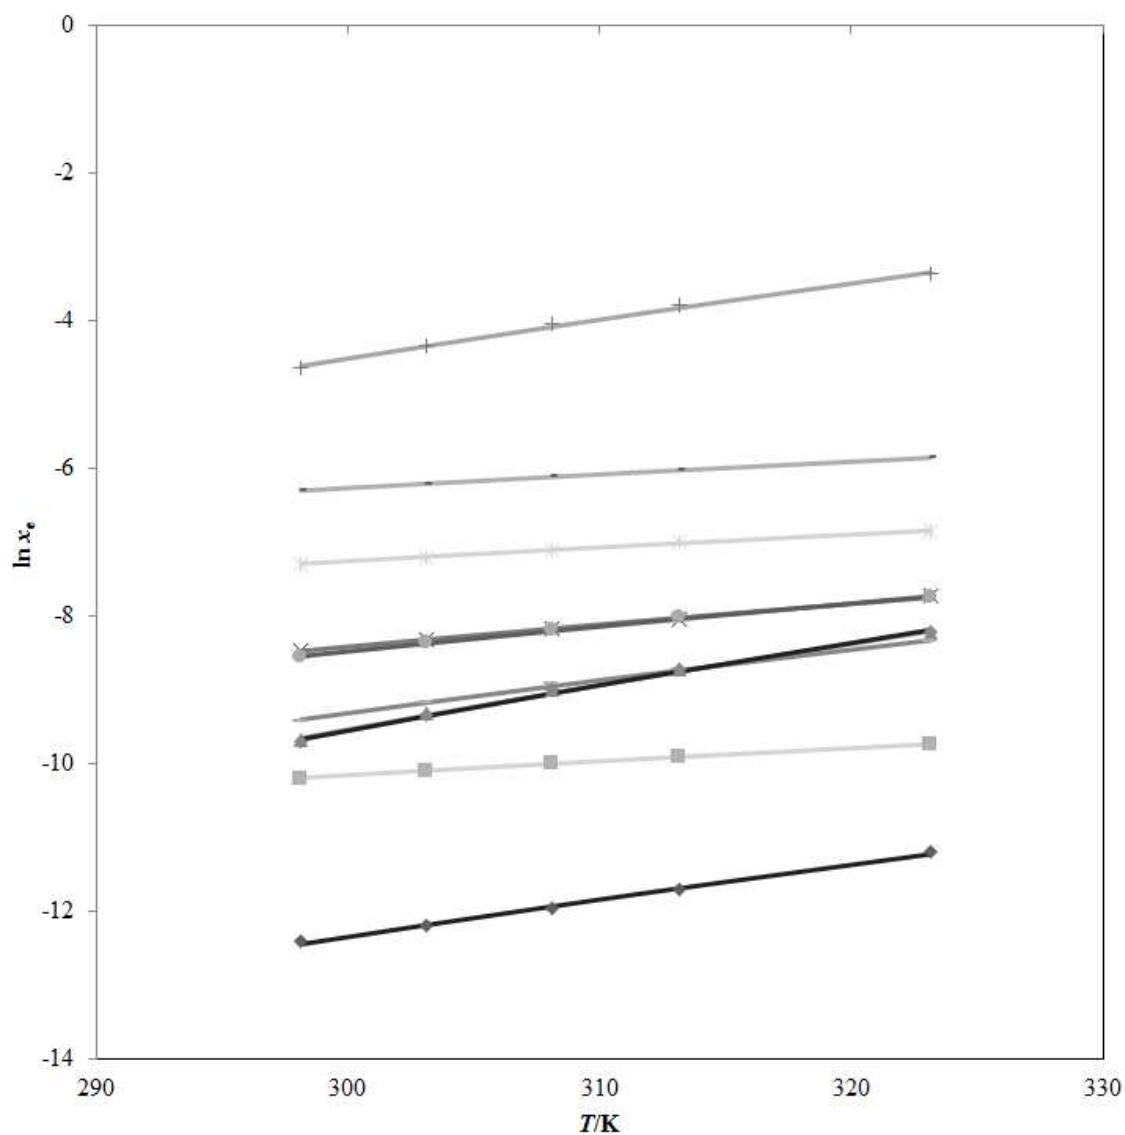

**Figure S2 Correlation of experimental solubilities of crystalline LNX with Van't Hoff model in different pure solvents at  $T = (298.15 \text{ to } 323.15) \text{ K}$ ;  $\blacklozenge$  water,  $\blacksquare$  ethanol,  $\blacktriangle$  IPA,  $\times$  EG,  $\ast$  EA,  $\bullet$  PG,  $+$  PEG-400,  $-$  Transcutol,  $-$  1-butanol and  $\blacklozenge$  2-butanol (solid lines represent the calculated solubilities of TNX calculated by Van't Hoff model)**

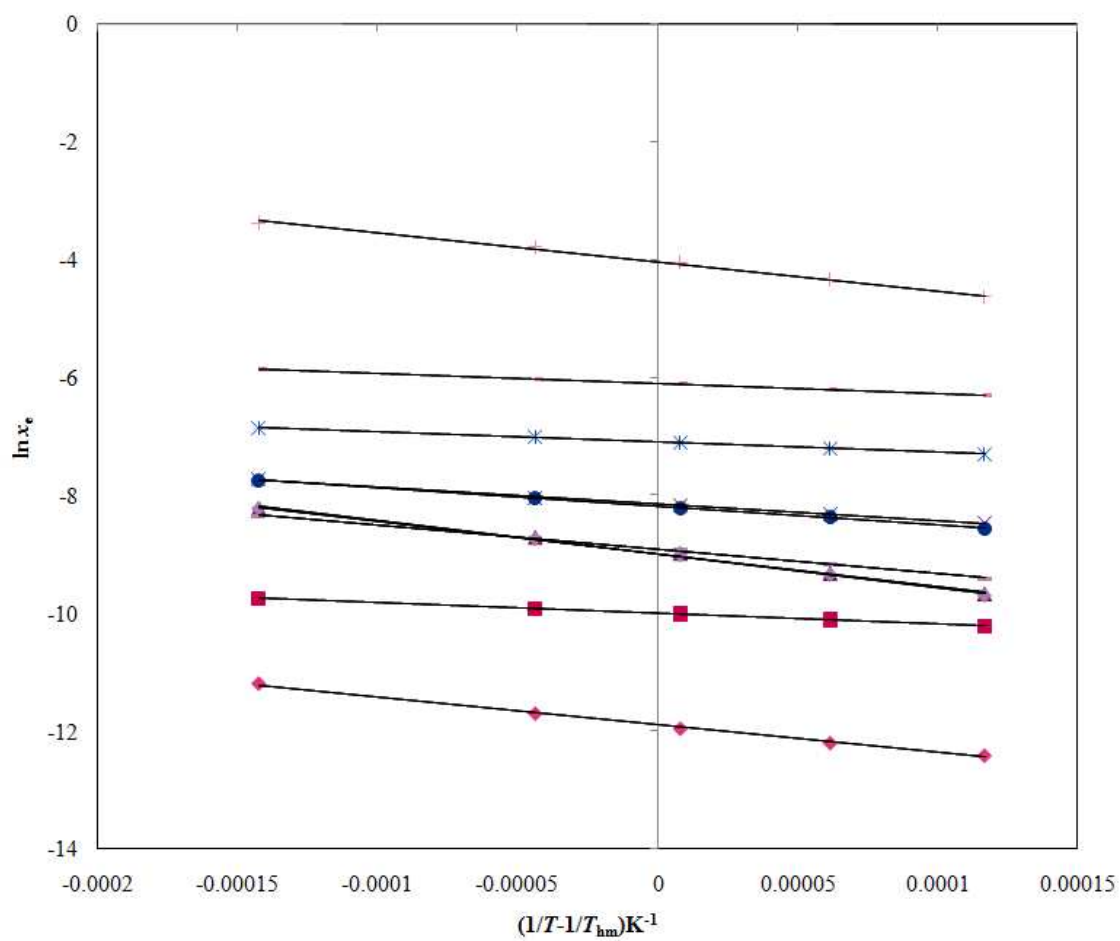

**Figure S3** Van't Hoff plots for crystalline TNX in different pure solvents;  $\blacklozenge$  water,  $\blacksquare$  ethanol,  $\blacktriangle$  IPA,  $\times$  EG,  $\ast$  EA,  $\bullet$  PG,  $+$  PEG-400,  $-$  Transcutol,  $-$  1-butanol and  $\blacklozenge$  2-butanol
